# Supplementary material
Source: Research Square preprint supplement (doi:10.21203/rs.3.rs-9677287/v1)
Supplement: Supplementary file 1 [file 4f3ed974ba4cce3ea4d56cf4.xlsx]

## Sheet: data
Gender	Experience	Workplace	Educational	Professional	a1	a2	a3	a4	a5	a6	a7	a8	a9	a10	a11	Sensing	Processing	Response	active_listening
1	1	3	2	1	3	3	4	4	5	3	5	4	5	5	5	3.5	4.33333	4.75	4.19444
1	1	3	2	1	2	3	4	4	3	3	3	3	4	3	4	3.25	3	3.5	3.25
1	1	3	2	1	4	5	4	4	5	4	4	5	5	5	5	4.25	4.33333	5	4.52778
1	1	3	2	1	4	3	4	5	5	4	4	4	5	5	4	4	4.33333	4.5	4.27778
1	1	3	2	1	3	3	4	3	5	4	5	5	5	5	5	3.25	4.66667	5	4.30556
1	1	3	2	1	4	3	3	4	5	5	5	4	4	4	5	3.5	5	4.25	4.25
1	1	3	2	1	2	3	3	3	4	4	5	5	5	5	5	2.75	4.33333	5	4.02778
1	1	3	2	1	4	4	4	4	4	4	4	4	4	4	4	4	4	4	4
1	1	3	2	1	3	2	4	4	4	3	5	4	4	5	5	3.25	4	4.5	3.91667
1	1	3	2	1	1	1	3	1	1	1	2	1	5	1	5	1.5	1.33333	3	1.94444
1	1	3	2	1	4	4	4	4	5	4	4	5	2	5	5	4	4.33333	4.25	4.19444
1	1	3	2	1	3	3	4	4	4	3	4	4	4	3	3	3.5	3.66667	3.5	3.55556
1	1	3	2	1	3	1	1	5	5	5	5	5	5	5	5	2.5	5	5	4.16667
1	1	3	2	1	3	1	4	5	5	5	5	5	5	5	5	3.25	5	5	4.41667
1	1	3	2	1	3	3	5	3	5	4	5	5	5	5	5	3.5	4.66667	5	4.38889
1	1	3	2	1	5	3	4	5	5	5	5	5	5	5	5	4.25	5	5	4.75
1	1	3	2	1	3	4	4	5	5	5	5	5	5	5	5	4	5	5	4.66667
1	1	3	2	1	1	5	5	5	5	3	5	5	5	5	5	4	4.33333	5	4.44444
1	1	3	2	1	3	3	5	5	3	5	5	5	5	5	5	4	4.33333	5	4.44444
1	1	3	2	1	3	1	1	5	5	5	5	5	5	5	5	2.5	5	5	4.16667
1	1	3	2	1	1	3	5	4	3	1	3	3	2	2	5	3.25	2.33333	3	2.86111
1	1	3	2	1	1	5	5	5	1	2	5	4	5	5	5	4	2.66667	4.75	3.80556
1	1	3	2	1	2	3	5	3	2	3	3	3	3	3	1	3.25	2.66667	2.5	2.80556
1	1	3	2	1	3	3	4	3	5	5	5	5	4	3	5	3.25	5	4.25	4.16667
1	1	3	2	1	3	3	3	4	4	4	4	5	5	5	5	3.25	4	5	4.08333
1	1	3	2	1	3	3	3	4	5	3	5	5	4	4	5	3.25	4.33333	4.5	4.02778
1	1	3	2	1	3	4	4	4	4	4	4	4	4	4	5	3.75	4	4.25	4
1	1	3	2	1	5	4	5	5	5	5	5	5	5	5	5	4.75	5	5	4.91667
1	1	3	2	1	1	4	5	4	4	4	4	4	3	4	5	3.5	4	4	3.83333
1	1	3	2	1	3	5	5	4	3	4	1	4	1	3	2	4.25	2.66667	2.5	3.13889
1	1	3	2	1	5	1	4	3	3	3	2	3	5	3	2	3.25	2.66667	3.25	3.05556
1	1	3	2	1	5	3	5	5	5	5	5	5	5	5	5	4.5	5	5	4.83333
1	1	3	2	1	5	3	5	5	5	5	5	5	5	5	5	4.5	5	5	4.83333
1	1	3	2	1	3	5	4	5	5	5	5	4	3	5	5	4.25	5	4.25	4.5
1	1	3	2	1	3	3	5	5	5	5	5	5	5	5	5	4	5	5	4.66667
1	1	3	2	1	1	1	1	1	1	1	2	2	2	2	2	1	1.33333	2	1.44444
1	1	3	2	1	2	5	5	3	2	3	3	3	5	5	5	3.75	2.66667	4.5	3.63889
1	1	3	1	1	5	3	5	5	5	5	5	5	5	5	5	4.5	5	5	4.83333
1	1	3	1	1	3	3	5	4	4	4	5	5	5	5	5	3.75	4.33333	5	4.36111
1	1	3	1	1	1	3	3	3	5	4	5	5	4	4	5	2.5	4.66667	4.5	3.88889
1	1	3	1	1	4	2	4	4	4	5	4	4	4	5	5	3.5	4.33333	4.5	4.11111
1	1	3	1	1	2	3	4	3	2	4	5	3	3	4	4	3	3.66667	3.5	3.38889
1	1	3	1	1	3	3	3	4	3	5	5	4	3	4	4	3.25	4.33333	3.75	3.77778
1	1	3	1	1	2	4	3	3	3	5	5	3	3	3	3	3	4.33333	3	3.44444
1	1	3	1	1	1	3	4	5	4	4	4	4	4	4	4	3.25	4	4	3.75
1	1	3	1	1	3	3	3	3	3	3	4	4	5	4	4	3	3.33333	4.25	3.52778
1	1	3	1	1	2	4	5	4	4	5	5	4	5	5	4	3.75	4.66667	4.5	4.30556
1	1	3	1	1	4	2	4	4	4	5	5	4	5	5	4	3.5	4.66667	4.5	4.22222
1	1	3	1	1	1	3	4	4	4	4	4	4	2	3	4	3	4	3.25	3.41667
1	1	3	1	1	5	4	5	4	4	2	5	4	4	5	4	4.5	3.66667	4.25	4.13889
1	1	3	1	1	3	3	4	4	4	4	4	4	3	3	5	3.5	4	3.75	3.75
1	1	3	1	1	4	3	4	4	4	4	4	4	4	4	4	3.75	4	4	3.91667
1	1	3	1	1	2	4	4	4	4	3	3	4	4	4	4	3.5	3.33333	4	3.61111
1	1	3	1	1	3	3	4	4	3	3	3	4	4	4	5	3.5	3	4.25	3.58333
1	1	3	1	1	2	4	4	4	4	4	4	4	3	4	4	3.5	4	3.75	3.75
1	1	3	1	1	5	3	3	3	3	1	3	4	4	4	5	3.5	2.33333	4.25	3.36111
1	1	3	1	1	4	4	3	3	5	5	4	4	3	3	4	3.5	4.66667	3.5	3.88889
1	1	3	1	1	3	1	3	4	3	5	3	3	5	3	3	2.75	3.66667	3.5	3.30556
1	1	3	1	1	3	3	4	3	3	4	3	3	4	3	3	3.25	3.33333	3.25	3.27778
1	1	3	1	1	3	4	3	3	4	4	4	4	3	4	4	3.25	4	3.75	3.66667
1	1	3	1	2	4	4	4	4	5	5	5	5	5	5	5	4	5	5	4.66667
1	1	3	1	2	5	3	2	3	4	2	4	4	4	3	4	3.25	3.33333	3.75	3.44444
1	1	3	1	2	4	4	4	4	4	4	4	4	4	4	5	4	4	4.25	4.08333
1	1	3	1	2	2	3	3	3	4	4	5	4	4	4	4	2.75	4.33333	4	3.69444
1	1	3	1	2	3	3	3	3	3	3	3	3	3	3	3	3	3	3	3
1	1	3	1	2	3	1	2	4	3	3	3	2	2	4	3	2.5	3	2.75	2.75
1	1	3	1	2	4	3	2	3	3	2	2	2	4	3	4	3	2.33333	3.25	2.86111
1	1	3	1	2	5	3	1	2	4	4	4	2	4	3	2	2.75	4	2.75	3.16667
1	1	3	1	2	4	4	4	4	5	5	5	5	5	5	5	4	5	5	4.66667
1	1	3	1	2	3	4	5	4	5	5	5	5	5	5	5	4	5	5	4.66667
1	1	3	1	2	3	4	5	4	5	5	5	5	5	5	5	4	5	5	4.66667
1	1	3	1	2	3	4	3	2	5	4	5	4	5	4	5	3	4.66667	4.5	4.05556
1	1	3	1	2	4	4	3	3	3	3	3	4	5	4	5	3.5	3	4.5	3.66667
1	1	3	1	2	5	4	4	4	5	4	4	5	5	5	4	4.25	4.33333	4.75	4.44444
1	1	3	1	2	1	2	2	2	2	3	3	3	3	2	2	1.75	2.66667	2.5	2.30556
1	1	3	1	2	2	2	4	4	4	4	4	3	4	4	5	3	4	4	3.66667
1	1	3	1	2	2	2	4	4	4	4	4	3	4	4	5	3	4	4	3.66667
1	1	3	1	2	3	3	2	4	4	5	5	5	5	5	5	3	4.66667	5	4.22222
1	1	3	1	2	3	4	4	4	4	5	5	5	5	5	5	3.75	4.66667	5	4.47222
1	1	3	1	2	3	3	4	3	5	4	5	5	5	3	5	3.25	4.66667	4.5	4.13889
1	1	3	1	2	3	3	3	4	4	4	4	5	5	5	5	3.25	4	5	4.08333
1	1	3	1	2	3	3	4	4	5	4	4	4	4	4	5	3.5	4.33333	4.25	4.02778
1	1	3	1	2	2	3	4	4	5	4	4	4	5	5	5	3.25	4.33333	4.75	4.11111
1	1	3	1	2	3	3	4	5	5	4	4	4	3	4	5	3.75	4.33333	4	4.02778
1	1	3	1	2	2	4	3	2	1	2	1	4	3	3	1	2.75	1.33333	2.75	2.27778
1	1	3	1	2	4	5	4	4	3	4	5	5	4	4	5	4.25	4	4.5	4.25
1	1	3	1	2	3	4	4	3	4	5	5	4	4	5	5	3.5	4.66667	4.5	4.22222
1	1	3	1	2	2	4	5	5	4	4	4	5	5	5	4	4	4	4.75	4.25
1	1	3	1	2	4	3	4	5	5	5	5	5	5	5	5	4	5	5	4.66667
1	1	3	1	2	4	3	5	5	5	5	5	5	5	4	5	4.25	5	4.75	4.66667
1	1	3	1	2	4	3	3	4	4	3	5	5	3	5	5	3.5	4	4.5	4
2	1	3	1	2	3	3	2	4	4	5	5	5	5	5	5	3	4.66667	5	4.22222
2	1	3	1	2	1	3	4	4	4	5	5	5	5	4	5	3	4.66667	4.75	4.13889
2	1	3	1	2	4	3	4	4	5	5	5	5	5	5	5	3.75	5	5	4.58333
2	1	3	1	2	3	3	4	3	4	2	4	4	3	3	4	3.25	3.33333	3.5	3.36111
2	1	3	1	2	3	3	3	4	4	4	4	4	4	5	3	3.25	4	4	3.75
2	1	3	1	2	5	3	4	5	5	4	5	5	5	5	5	4.25	4.66667	5	4.63889
2	1	3	1	2	2	4	4	4	4	4	4	4	4	4	4	3.5	4	4	3.83333
2	1	3	1	2	3	2	4	3	4	4	4	4	4	4	4	3	4	4	3.66667
2	1	3	1	2	1	3	4	5	4	4	4	4	4	4	5	3.25	4	4.25	3.83333
2	1	3	1	2	3	4	5	5	4	4	5	4	3	4	5	4.25	4.33333	4	4.19444
2	1	3	1	2	4	3	4	5	5	5	5	5	5	5	5	4	5	5	4.66667
2	1	3	1	2	3	3	4	3	4	2	4	4	3	3	4	3.25	3.33333	3.5	3.36111
2	1	3	1	2	3	2	4	3	4	4	4	4	4	4	4	3	4	4	3.66667
2	1	3	1	2	1	3	4	4	4	5	5	5	5	4	5	3	4.66667	4.75	4.13889
2	1	3	1	2	1	1	1	1	1	1	1	1	1	1	1	1	1	1	1
2	1	3	1	2	3	3	4	4	4	4	3	4	5	5	5	3.5	3.66667	4.75	3.97222
2	1	3	1	2	3	3	4	4	2	4	3	4	3	3	3	3.5	3	3.25	3.25
2	1	3	1	2	4	3	5	5	4	2	4	1	5	3	2	4.25	3.33333	2.75	3.44444
2	1	3	1	2	3	3	4	5	3	3	3	3	3	3	3	3.75	3	3	3.25
2	1	3	1	2	2	1	4	1	5	5	5	5	5	5	3	2	5	4.5	3.83333
2	1	3	1	2	3	4	4	5	4	5	5	5	5	4	5	4	4.66667	4.75	4.47222
2	1	3	1	2	1	1	1	1	1	1	1	1	1	1	1	1	1	1	1
2	1	3	1	2	3	2	2	5	5	4	2	3	3	4	4	3	3.66667	3.5	3.38889
2	1	3	1	2	3	1	4	4	3	3	3	3	3	3	3	3	3	3	3
2	1	3	1	2	2	2	3	3	3	3	1	3	2	5	4	2.5	2.33333	3.5	2.77778
2	1	3	1	2	4	2	2	4	2	4	3	4	3	2	3	3	3	3	3
2	1	3	1	2	4	4	4	3	3	3	4	4	5	4	4	3.75	3.33333	4.25	3.77778
2	1	3	1	2	3	3	3	3	3	5	5	5	5	5	5	3	4.33333	5	4.11111
2	1	3	1	2	3	3	4	4	4	4	3	4	5	5	5	3.5	3.66667	4.75	3.97222
2	1	3	1	2	3	3	4	4	3	4	4	4	4	4	5	3.5	3.66667	4.25	3.80556
2	1	3	1	2	3	3	3	5	5	5	5	5	5	5	5	3.5	5	5	4.5
2	1	3	1	2	3	4	5	5	4	4	5	4	3	4	5	4.25	4.33333	4	4.19444
2	1	3	1	2	4	2	5	5	4	4	4	4	5	4	3	4	4	4	4
2	1	3	1	2	3	3	2	3	3	3	4	4	3	4	4	2.75	3.33333	3.75	3.27778
2	1	3	1	2	3	2	2	3	2	1	1	1	2	1	1	2.5	1.33333	1.25	1.69444
2	1	3	1	2	3	3	4	4	5	4	5	5	5	4	4	3.5	4.66667	4.5	4.22222
2	1	3	1	2	1	1	2	4	3	3	2	3	4	3	3	2	2.66667	3.25	2.63889
2	1	3	1	2	3	2	4	4	4	3	3	4	3	4	4	3.25	3.33333	3.75	3.44444
2	1	3	1	2	1	1	4	4	5	4	5	4	4	5	5	2.5	4.66667	4.5	3.88889
2	1	3	1	2	5	5	5	5	5	4	5	5	5	5	5	5	4.66667	5	4.88889
2	1	3	1	2	2	3	1	3	4	4	5	2	3	4	2	2.25	4.33333	2.75	3.11111
2	1	3	1	2	3	4	5	3	4	3	5	5	1	5	4	3.75	4	3.75	3.83333
2	1	3	1	2	2	1	3	3	4	4	5	5	2	4	2	2.25	4.33333	3.25	3.27778
2	1	3	1	2	3	3	4	4	3	3	4	4	5	2	2	3.5	3.33333	3.25	3.36111
2	1	3	1	2	1	1	5	4	5	5	5	5	5	5	5	2.75	5	5	4.25
2	1	3	1	2	1	1	3	5	5	5	5	5	4	4	1	2.5	5	3.5	3.66667
2	1	3	1	2	2	1	1	5	1	1	1	1	1	1	1	2.25	1	1	1.41667
2	1	3	1	2	3	4	4	4	4	5	5	5	5	5	5	3.75	4.66667	5	4.47222
2	2	3	1	2	3	3	3	3	3	3	3	3	3	3	3	3	3	3	3
2	2	3	1	2	3	3	4	3	3	3	4	5	5	3	4	3.25	3.33333	4.25	3.61111
2	2	3	1	2	3	1	1	3	2	3	5	5	5	5	5	2	3.33333	5	3.44444
2	2	3	1	2	1	3	3	3	5	5	5	4	5	5	3	2.5	5	4.25	3.91667
2	2	3	1	2	4	5	5	5	5	5	5	5	5	5	5	4.75	5	5	4.91667
2	2	3	1	2	2	3	3	2	3	4	2	2	3	3	2	2.5	3	2.5	2.66667
2	2	3	1	2	2	4	2	3	3	3	3	3	3	3	3	2.75	3	3	2.91667
2	2	3	1	2	1	1	4	3	3	5	1	1	5	3	5	2.25	3	3.5	2.91667
2	2	3	1	2	1	2	2	2	1	1	1	1	1	1	4	1.75	1	1.75	1.5
2	2	3	1	2	3	3	2	3	3	3	3	3	3	3	3	2.75	3	3	2.91667
2	2	3	1	2	2	2	3	3	4	3	4	3	4	5	2	2.5	3.66667	3.5	3.22222
2	2	3	1	2	4	5	4	3	4	4	3	5	5	5	5	4	3.66667	5	4.22222
2	2	3	1	2	3	4	4	3	5	4	5	5	5	5	5	3.5	4.66667	5	4.38889
2	2	2	1	2	1	1	1	1	5	5	5	4	3	2	2	1	5	2.75	2.91667
2	2	2	1	2	3	5	5	5	5	4	5	5	5	5	5	4.5	4.66667	5	4.72222
2	2	2	1	2	2	2	3	4	5	4	5	5	5	5	5	2.75	4.66667	5	4.13889
2	2	2	1	2	1	4	5	5	5	5	5	5	5	5	5	3.75	5	5	4.58333
2	2	2	1	2	1	5	5	5	5	5	5	5	5	5	5	4	5	5	4.66667
2	2	2	1	2	4	5	5	5	5	5	5	5	5	5	5	4.75	5	5	4.91667
2	2	2	1	2	3	4	4	3	5	4	5	5	5	5	5	3.5	4.66667	5	4.38889
2	2	2	1	2	2	2	3	4	5	4	5	5	5	5	5	2.75	4.66667	5	4.13889
2	2	2	1	2	1	1	4	3	3	5	1	1	5	3	5	2.25	3	3.5	2.91667
2	2	2	1	2	1	2	2	2	2	2	3	2	5	3	5	1.75	2.33333	3.75	2.61111
2	2	2	1	2	5	5	5	5	4	5	5	5	5	5	5	5	4.66667	5	4.88889
2	2	2	1	2	1	1	1	1	1	3	3	3	2	1	1	1	2.33333	1.75	1.69444
2	2	2	1	2	2	3	3	2	3	4	2	2	3	3	2	2.5	3	2.5	2.66667
2	2	2	1	2	2	5	5	2	3	5	1	4	5	5	5	3.5	3	4.75	3.75
2	2	2	1	2	3	3	5	3	2	2	3	2	2	3	2	3.5	2.33333	2.25	2.69444
2	2	2	1	2	3	4	5	3	4	3	5	5	1	5	4	3.75	4	3.75	3.83333
2	2	2	1	2	5	5	3	4	4	5	4	5	5	5	5	4.25	4.33333	5	4.52778
2	2	2	1	2	3	3	5	5	5	5	5	5	5	5	5	4	5	5	4.66667
2	2	2	1	2	3	2	4	3	2	3	4	4	4	4	4	3	3	4	3.33333
2	2	2	1	2	1	1	1	1	2	1	3	1	1	1	1	1	2	1	1.33333
2	2	2	1	2	1	1	1	1	1	3	3	3	2	1	1	1	2.33333	1.75	1.69444
2	2	2	1	2	3	3	4	3	4	4	4	4	4	4	4	3.25	4	4	3.75
2	2	2	1	2	2	4	4	2	3	4	3	3	3	3	3	3	3.33333	3	3.11111
2	2	2	1	1	2	1	3	3	4	4	5	5	2	4	2	2.25	4.33333	3.25	3.27778
2	2	2	2	1	3	2	4	4	4	3	3	4	3	4	4	3.25	3.33333	3.75	3.44444
2	2	2	2	1	4	2	5	5	4	4	4	4	5	4	3	4	4	4	4
2	2	2	2	1	1	1	1	1	2	1	3	1	1	1	1	1	2	1	1.33333
2	2	2	2	1	2	2	3	3	4	3	4	3	4	5	2	2.5	3.66667	3.5	3.22222
2	2	2	2	1	2	4	2	3	3	3	3	3	3	3	3	2.75	3	3	2.91667
2	2	2	2	1	2	3	1	3	4	4	5	2	3	4	2	2.25	4.33333	2.75	3.11111
2	2	2	2	1	1	4	3	3	4	4	4	3	3	4	3	2.75	4	3.25	3.33333
2	2	1	2	1	3	3	5	4	5	3	5	3	4	4	4	3.75	4.33333	3.75	3.94444
2	2	1	2	1	3	4	3	3	3	3	3	3	4	3	4	3.25	3	3.5	3.25
2	2	1	2	1	3	4	3	3	3	3	3	3	4	3	4	3.25	3	3.5	3.25
2	2	1	2	1	3	4	3	3	3	3	3	3	4	3	4	3.25	3	3.5	3.25
2	2	1	2	1	3	3	2	4	4	5	5	5	5	5	5	3	4.66667	5	4.22222
2	3	1	2	1	1	3	4	4	4	5	5	5	5	4	5	3	4.66667	4.75	4.13889
2	3	1	2	1	4	3	4	4	5	5	5	5	5	5	5	3.75	5	5	4.58333
2	3	1	2	1	3	3	4	3	4	2	4	4	3	3	4	3.25	3.33333	3.5	3.36111
2	3	1	2	1	3	3	3	4	4	4	4	4	4	5	3	3.25	4	4	3.75
2	3	1	2	1	5	3	4	5	5	4	5	5	5	5	5	4.25	4.66667	5	4.63889
2	3	1	2	1	2	4	4	4	4	4	4	4	4	4	4	3.5	4	4	3.83333
2	3	1	2	1	3	2	4	3	4	4	4	4	4	4	4	3	4	4	3.66667
2	3	1	2	1	1	3	4	5	4	4	4	4	4	4	5	3.25	4	4.25	3.83333
2	3	1	2	1	3	4	5	5	4	4	5	4	3	4	5	4.25	4.33333	4	4.19444
2	3	1	2	1	4	3	4	5	5	5	5	5	5	5	5	4	5	5	4.66667
2	3	1	2	1	3	3	4	3	4	2	4	4	3	3	4	3.25	3.33333	3.5	3.36111
2	3	1	2	1	3	2	4	3	4	4	4	4	4	4	4	3	4	4	3.66667
2	3	1	2	1	1	3	4	4	4	5	5	5	5	4	5	3	4.66667	4.75	4.13889
2	3	1	2	1	1	1	1	1	1	1	1	1	1	1	1	1	1	1	1
2	3	1	2	1	3	3	4	4	4	4	3	4	5	5	5	3.5	3.66667	4.75	3.97222
2	3	1	2	1	3	3	4	4	2	4	3	4	3	3	3	3.5	3	3.25	3.25
2	3	1	2	1	4	3	5	5	4	2	4	1	5	3	2	4.25	3.33333	2.75	3.44444
2	3	1	2	1	3	3	4	5	3	3	3	3	3	3	3	3.75	3	3	3.25
2	3	1	2	1	2	1	4	1	5	5	5	5	5	5	3	2	5	4.5	3.83333
2	3	1	2	1	3	4	4	5	4	5	5	5	5	4	5	4	4.66667	4.75	4.47222
2	3	1	2	1	1	1	1	1	1	1	1	1	1	1	1	1	1	1	1
2	3	1	2	1	3	2	2	5	5	4	2	3	3	4	4	3	3.66667	3.5	3.38889
2	3	1	2	1	3	1	4	4	3	3	3	3	3	3	3	3	3	3	3
2	3	1	2	1	2	2	3	3	3	3	1	3	2	5	4	2.5	2.33333	3.5	2.77778
2	3	1	2	1	4	2	2	4	2	4	3	4	3	2	3	3	3	3	3
2	3	1	2	1	4	4	4	3	3	3	4	4	5	4	4	3.75	3.33333	4.25	3.77778
2	3	1	2	1	3	3	3	3	3	5	5	5	5	5	5	3	4.33333	5	4.11111
2	3	1	2	1	3	3	4	4	4	4	3	4	5	5	5	3.5	3.66667	4.75	3.97222
2	3	1	2	1	3	3	4	4	3	4	4	4	4	4	5	3.5	3.66667	4.25	3.80556
2	3	1	2	1	3	3	3	5	5	5	5	5	5	5	5	3.5	5	5	4.5
2	3	1	2	1	3	4	5	5	4	4	5	4	3	4	5	4.25	4.33333	4	4.19444
2	3	1	2	1	4	2	5	5	4	4	4	4	5	4	3	4	4	4	4
2	3	1	2	1	3	3	2	3	3	3	4	4	3	4	4	2.75	3.33333	3.75	3.27778
2	3	1	2	1	3	2	2	3	2	1	1	1	2	1	1	2.5	1.33333	1.25	1.69444
